# Supplementary material for: On-chip dilution in nanoliter droplets
Source: Royal Society of Chemistry journal article supplement (doi:10.1039/c4an01829j), 2015-01-01
Supplement: c4an01829j2.wlmp [file c4an01829j2.wlmp]

<?xml version="1.0" encoding="utf-8"?>
<Project name="droplet dilution" themeId="0" version="65538" templateID="SimpleProjectTemplate">
  <MediaItems>
    <MediaItem id="1" filePath="C:\Users\Raviraj\Desktop\Research\Droplets\Draft_Manuscript\Controlling concetration gradients in droplets\images and figures\schematic of gradient generation.png" arWidth="1599" arHeight="888" duration="0" songTitle="" songArtist="" songAlbum="" />
    <MediaItem id="2" filePath="C:\Users\Raviraj\Desktop\Research\Droplets\Draft_Manuscript\Controlling concetration gradients in droplets\result\DILUTION\Video_20140306195240.avi" arWidth="1280" arHeight="1024" duration="1032.4666666000001" songTitle="" songArtist="" songAlbum="" />
    <MediaItem id="3" filePath="C:\Users\Raviraj\Desktop\Research\Droplets\Draft_Manuscript\Controlling concetration gradients in droplets\result\droplet dilution final paper 2\drop 6 pump strokes.avi" arWidth="600" arHeight="600" duration="115.40000000000001" songTitle="" songArtist="" songAlbum="" />
    <MediaItem id="4" filePath="C:\Users\Raviraj\Desktop\Research\Droplets\Draft_Manuscript\Controlling concetration gradients in droplets\result\droplet dilution final paper 2\downstream 2 3 pumop strokes.avi" arWidth="600" arHeight="600" duration="133.66666660000001" songTitle="" songArtist="" songAlbum="" />
  </MediaItems>
  <Extents>
    <VideoClip extentID="17" gapBefore="0" mediaItemID="2" inTime="437.19282293827752" outTime="461.89298242631583" speed="1">
      <Effects />
      <Transitions />
      <BoundProperties>
        <BoundPropertyBool Name="Mute" Value="false" />
        <BoundPropertyInt Name="rotateStepNinety" Value="0" />
        <BoundPropertyFloat Name="Volume" Value="1" />
      </BoundProperties>
    </VideoClip>
    <VideoClip extentID="19" gapBefore="0" mediaItemID="2" inTime="454.48293457990434" outTime="543.40350873684213" speed="1">
      <Effects />
      <Transitions />
      <BoundProperties>
        <BoundPropertyBool Name="Mute" Value="false" />
        <BoundPropertyInt Name="rotateStepNinety" Value="0" />
        <BoundPropertyFloat Name="Volume" Value="1" />
      </BoundProperties>
    </VideoClip>
    <TitleClip extentID="22" gapBefore="0" duration="4">
      <Effects />
      <Transitions />
      <BoundProperties>
        <BoundPropertyFloatSet Name="diffuseColor">
          <BoundPropertyFloatElement Value="0" />
          <BoundPropertyFloatElement Value="0" />
          <BoundPropertyFloatElement Value="0" />
        </BoundPropertyFloatSet>
        <BoundPropertyFloat Name="transparency" Value="0" />
      </BoundProperties>
    </TitleClip>
    <ImageClip extentID="5" gapBefore="0" mediaItemID="1" duration="7">
      <Effects />
      <Transitions />
      <BoundProperties>
        <BoundPropertyInt Name="rotateStepNinety" Value="0" />
      </BoundProperties>
    </ImageClip>
    <TitleClip extentID="23" gapBefore="88.910574156937798" duration="4">
      <Effects>
        <TextEffect effectTemplateID="TextEffectTemplate" TextScriptId="0">
          <BoundProperties>
            <BoundPropertyBool Name="automatic" Value="false" />
            <BoundPropertyFloatSet Name="color">
              <BoundPropertyFloatElement Value="1" />
              <BoundPropertyFloatElement Value="1" />
              <BoundPropertyFloatElement Value="1" />
            </BoundPropertyFloatSet>
            <BoundPropertyStringSet Name="family">
              <BoundPropertyStringElement Value="Segoe UI" />
            </BoundPropertyStringSet>
            <BoundPropertyBool Name="horizontal" Value="true" />
            <BoundPropertyStringSet Name="justify">
              <BoundPropertyStringElement Value="MIDDLE" />
            </BoundPropertyStringSet>
            <BoundPropertyFloatSet Name="length">
              <BoundPropertyFloatElement Value="4.0999999046325684" />
              <BoundPropertyFloatElement Value="5.1999998092651367" />
            </BoundPropertyFloatSet>
            <BoundPropertyFloat Name="maxExtent" Value="5" />
            <BoundPropertyFloatSet Name="position">
              <BoundPropertyFloatElement Value="-0.069869041442871094" />
              <BoundPropertyFloatElement Value="0.88372087478637695" />
              <BoundPropertyFloatElement Value="0.02500000037252903" />
            </BoundPropertyFloatSet>
            <BoundPropertyFloat Name="size" Value="0.60000002384185791" />
            <BoundPropertyStringSet Name="string">
              <BoundPropertyStringElement Value="Microscopic view of the T junction. " />
              <BoundPropertyStringElement Value="" />
            </BoundPropertyStringSet>
            <BoundPropertyString Name="style" Value="Plain" />
            <BoundPropertyFloat Name="transparency" Value="0" />
          </BoundProperties>
        </TextEffect>
      </Effects>
      <Transitions />
      <BoundProperties>
        <BoundPropertyFloatSet Name="diffuseColor">
          <BoundPropertyFloatElement Value="0.75" />
          <BoundPropertyFloatElement Value="1" />
          <BoundPropertyFloatElement Value="0" />
        </BoundPropertyFloatSet>
        <BoundPropertyFloat Name="transparency" Value="1" />
      </BoundProperties>
    </TitleClip>
    <VideoClip extentID="6" gapBefore="0" mediaItemID="2" inTime="424.84274319425839" outTime="437.19282293827752" speed="1">
      <Effects />
      <Transitions />
      <BoundProperties>
        <BoundPropertyBool Name="Mute" Value="false" />
        <BoundPropertyInt Name="rotateStepNinety" Value="0" />
        <BoundPropertyFloat Name="Volume" Value="1" />
      </BoundProperties>
    </VideoClip>
    <VideoClip extentID="24" gapBefore="0" mediaItemID="3" inTime="10.214832535885169" outTime="101.04401913875598" speed="1">
      <Effects />
      <Transitions />
      <BoundProperties>
        <BoundPropertyBool Name="Mute" Value="false" />
        <BoundPropertyInt Name="rotateStepNinety" Value="0" />
        <BoundPropertyFloat Name="Volume" Value="1" />
      </BoundProperties>
    </VideoClip>
    <TitleClip extentID="8" gapBefore="0" duration="4">
      <Effects />
      <Transitions />
      <BoundProperties>
        <BoundPropertyFloatSet Name="diffuseColor">
          <BoundPropertyFloatElement Value="0" />
          <BoundPropertyFloatElement Value="0" />
          <BoundPropertyFloatElement Value="0" />
        </BoundPropertyFloatSet>
        <BoundPropertyFloat Name="transparency" Value="0" />
      </BoundProperties>
    </TitleClip>
    <TitleClip extentID="26" gapBefore="0" duration="7">
      <Effects />
      <Transitions />
      <BoundProperties>
        <BoundPropertyFloatSet Name="diffuseColor">
          <BoundPropertyFloatElement Value="0" />
          <BoundPropertyFloatElement Value="0" />
          <BoundPropertyFloatElement Value="0" />
        </BoundPropertyFloatSet>
        <BoundPropertyFloat Name="transparency" Value="0" />
      </BoundProperties>
    </TitleClip>
    <TitleClip extentID="9" gapBefore="0" duration="4">
      <Effects>
        <TextEffect effectTemplateID="TextEffectTemplate" TextScriptId="0">
          <BoundProperties>
            <BoundPropertyBool Name="automatic" Value="false" />
            <BoundPropertyFloatSet Name="color">
              <BoundPropertyFloatElement Value="1" />
              <BoundPropertyFloatElement Value="1" />
              <BoundPropertyFloatElement Value="1" />
            </BoundPropertyFloatSet>
            <BoundPropertyStringSet Name="family">
              <BoundPropertyStringElement Value="Segoe UI" />
            </BoundPropertyStringSet>
            <BoundPropertyBool Name="horizontal" Value="true" />
            <BoundPropertyStringSet Name="justify">
              <BoundPropertyStringElement Value="MIDDLE" />
            </BoundPropertyStringSet>
            <BoundPropertyFloatSet Name="length">
              <BoundPropertyFloatElement Value="4.0999999046325684" />
              <BoundPropertyFloatElement Value="5.1999998092651367" />
            </BoundPropertyFloatSet>
            <BoundPropertyFloat Name="maxExtent" Value="5" />
            <BoundPropertyFloatSet Name="position">
              <BoundPropertyFloatElement Value="0.11644840240478516" />
              <BoundPropertyFloatElement Value="1.6976743936538696" />
              <BoundPropertyFloatElement Value="0.02500000037252903" />
            </BoundPropertyFloatSet>
            <BoundPropertyFloat Name="size" Value="0.5" />
            <BoundPropertyStringSet Name="string">
              <BoundPropertyStringElement Value="&quot;On-demand Dilution in Nanolitre Droplets&quot;" />
              <BoundPropertyStringElement Value="Raviraj Thakur, Ahmed Amin, Steve Wereley" />
              <BoundPropertyStringElement Value="Purdue University" />
              <BoundPropertyStringElement Value="Microfluidic Innovations" />
            </BoundPropertyStringSet>
            <BoundPropertyString Name="style" Value="Plain" />
            <BoundPropertyFloat Name="transparency" Value="0" />
          </BoundProperties>
        </TextEffect>
      </Effects>
      <Transitions />
      <BoundProperties>
        <BoundPropertyFloatSet Name="diffuseColor">
          <BoundPropertyFloatElement Value="0.75" />
          <BoundPropertyFloatElement Value="1" />
          <BoundPropertyFloatElement Value="0" />
        </BoundPropertyFloatSet>
        <BoundPropertyFloat Name="transparency" Value="1" />
      </BoundProperties>
    </TitleClip>
    <TitleClip extentID="27" gapBefore="90.829186602870834" duration="7">
      <Effects>
        <TextEffect effectTemplateID="TextEffectTemplate" TextScriptId="0">
          <BoundProperties>
            <BoundPropertyBool Name="automatic" Value="false" />
            <BoundPropertyFloatSet Name="color">
              <BoundPropertyFloatElement Value="1" />
              <BoundPropertyFloatElement Value="1" />
              <BoundPropertyFloatElement Value="1" />
            </BoundPropertyFloatSet>
            <BoundPropertyStringSet Name="family">
              <BoundPropertyStringElement Value="Segoe UI" />
            </BoundPropertyStringSet>
            <BoundPropertyBool Name="horizontal" Value="true" />
            <BoundPropertyStringSet Name="justify">
              <BoundPropertyStringElement Value="MIDDLE" />
            </BoundPropertyStringSet>
            <BoundPropertyFloatSet Name="length">
              <BoundPropertyFloatElement Value="4.0999999046325684" />
              <BoundPropertyFloatElement Value="5.1999998092651367" />
            </BoundPropertyFloatSet>
            <BoundPropertyFloat Name="maxExtent" Value="5" />
            <BoundPropertyFloatSet Name="position">
              <BoundPropertyFloatElement Value="0.3726348876953125" />
              <BoundPropertyFloatElement Value="0.83720922470092773" />
              <BoundPropertyFloatElement Value="0.02500000037252903" />
            </BoundPropertyFloatSet>
            <BoundPropertyFloat Name="size" Value="0.60000002384185791" />
            <BoundPropertyStringSet Name="string">
              <BoundPropertyStringElement Value="Microscopic view " />
              <BoundPropertyStringElement Value="downstream of T junction" />
            </BoundPropertyStringSet>
            <BoundPropertyString Name="style" Value="Plain" />
            <BoundPropertyFloat Name="transparency" Value="0" />
          </BoundProperties>
        </TextEffect>
      </Effects>
      <Transitions />
      <BoundProperties>
        <BoundPropertyFloatSet Name="diffuseColor">
          <BoundPropertyFloatElement Value="0.75" />
          <BoundPropertyFloatElement Value="1" />
          <BoundPropertyFloatElement Value="0" />
        </BoundPropertyFloatSet>
        <BoundPropertyFloat Name="transparency" Value="1" />
      </BoundProperties>
    </TitleClip>
    <TitleClip extentID="10" gapBefore="0" duration="4">
      <Effects />
      <Transitions />
      <BoundProperties>
        <BoundPropertyFloatSet Name="diffuseColor">
          <BoundPropertyFloatElement Value="0" />
          <BoundPropertyFloatElement Value="0" />
          <BoundPropertyFloatElement Value="0" />
        </BoundPropertyFloatSet>
        <BoundPropertyFloat Name="transparency" Value="0" />
      </BoundProperties>
    </TitleClip>
    <VideoClip extentID="28" gapBefore="0" mediaItemID="4" inTime="28.460127577511965" outTime="123.1140350263158" speed="1">
      <Effects />
      <Transitions />
      <BoundProperties>
        <BoundPropertyBool Name="Mute" Value="false" />
        <BoundPropertyInt Name="rotateStepNinety" Value="0" />
        <BoundPropertyFloat Name="Volume" Value="1" />
      </BoundProperties>
    </VideoClip>
    <TitleClip extentID="11" gapBefore="7" duration="4">
      <Effects>
        <TextEffect effectTemplateID="TextEffectTemplate" TextScriptId="0">
          <BoundProperties>
            <BoundPropertyBool Name="automatic" Value="false" />
            <BoundPropertyFloatSet Name="color">
              <BoundPropertyFloatElement Value="1" />
              <BoundPropertyFloatElement Value="1" />
              <BoundPropertyFloatElement Value="1" />
            </BoundPropertyFloatSet>
            <BoundPropertyStringSet Name="family">
              <BoundPropertyStringElement Value="Segoe UI" />
            </BoundPropertyStringSet>
            <BoundPropertyBool Name="horizontal" Value="true" />
            <BoundPropertyStringSet Name="justify">
              <BoundPropertyStringElement Value="MIDDLE" />
            </BoundPropertyStringSet>
            <BoundPropertyFloatSet Name="length">
              <BoundPropertyFloatElement Value="4.0999999046325684" />
              <BoundPropertyFloatElement Value="5.1999998092651367" />
            </BoundPropertyFloatSet>
            <BoundPropertyFloat Name="maxExtent" Value="5" />
            <BoundPropertyFloatSet Name="position">
              <BoundPropertyFloatElement Value="0.046579360961914063" />
              <BoundPropertyFloatElement Value="1.4651162624359131" />
              <BoundPropertyFloatElement Value="0.02500000037252903" />
            </BoundPropertyFloatSet>
            <BoundPropertyFloat Name="size" Value="0.5" />
            <BoundPropertyStringSet Name="string">
              <BoundPropertyStringElement Value="Step 1. Sample injections using " />
              <BoundPropertyStringElement Value="on-chip peristaltic pump 2." />
              <BoundPropertyStringElement Value="The number of pump strokes " />
              <BoundPropertyStringElement Value="determine the quantity of sample" />
            </BoundPropertyStringSet>
            <BoundPropertyString Name="style" Value="Plain" />
            <BoundPropertyFloat Name="transparency" Value="0" />
          </BoundProperties>
        </TextEffect>
      </Effects>
      <Transitions />
      <BoundProperties>
        <BoundPropertyFloatSet Name="diffuseColor">
          <BoundPropertyFloatElement Value="0.75" />
          <BoundPropertyFloatElement Value="1" />
          <BoundPropertyFloatElement Value="0" />
        </BoundPropertyFloatSet>
        <BoundPropertyFloat Name="transparency" Value="1" />
      </BoundProperties>
    </TitleClip>
    <TitleClip extentID="12" gapBefore="0" duration="7">
      <Effects />
      <Transitions />
      <BoundProperties>
        <BoundPropertyFloatSet Name="diffuseColor">
          <BoundPropertyFloatElement Value="0" />
          <BoundPropertyFloatElement Value="0" />
          <BoundPropertyFloatElement Value="0" />
        </BoundPropertyFloatSet>
        <BoundPropertyFloat Name="transparency" Value="0" />
      </BoundProperties>
    </TitleClip>
    <TitleClip extentID="13" gapBefore="12.350079744019126" duration="7">
      <Effects>
        <TextEffect effectTemplateID="TextEffectTemplate" TextScriptId="0">
          <BoundProperties>
            <BoundPropertyBool Name="automatic" Value="false" />
            <BoundPropertyFloatSet Name="color">
              <BoundPropertyFloatElement Value="1" />
              <BoundPropertyFloatElement Value="1" />
              <BoundPropertyFloatElement Value="1" />
            </BoundPropertyFloatSet>
            <BoundPropertyStringSet Name="family">
              <BoundPropertyStringElement Value="Segoe UI" />
            </BoundPropertyStringSet>
            <BoundPropertyBool Name="horizontal" Value="true" />
            <BoundPropertyStringSet Name="justify">
              <BoundPropertyStringElement Value="MIDDLE" />
            </BoundPropertyStringSet>
            <BoundPropertyFloatSet Name="length">
              <BoundPropertyFloatElement Value="4.0999999046325684" />
              <BoundPropertyFloatElement Value="5.1999998092651367" />
            </BoundPropertyFloatSet>
            <BoundPropertyFloat Name="maxExtent" Value="5" />
            <BoundPropertyFloatSet Name="position">
              <BoundPropertyFloatElement Value="-0.11644792556762695" />
              <BoundPropertyFloatElement Value="1.883720874786377" />
              <BoundPropertyFloatElement Value="0.02500000037252903" />
            </BoundPropertyFloatSet>
            <BoundPropertyFloat Name="size" Value="0.5" />
            <BoundPropertyStringSet Name="string">
              <BoundPropertyStringElement Value="Step 2: Buffer solution is now pumped using " />
              <BoundPropertyStringElement Value="on-chip pump 1. " />
              <BoundPropertyStringElement Value="An axial gradient is generated in the sample " />
              <BoundPropertyStringElement Value="due to convection-diffusion effects.  " />
            </BoundPropertyStringSet>
            <BoundPropertyString Name="style" Value="Plain" />
            <BoundPropertyFloat Name="transparency" Value="0" />
          </BoundProperties>
        </TextEffect>
      </Effects>
      <Transitions />
      <BoundProperties>
        <BoundPropertyFloatSet Name="diffuseColor">
          <BoundPropertyFloatElement Value="0.75" />
          <BoundPropertyFloatElement Value="1" />
          <BoundPropertyFloatElement Value="0" />
        </BoundPropertyFloatSet>
        <BoundPropertyFloat Name="transparency" Value="1" />
      </BoundProperties>
    </TitleClip>
    <TitleClip extentID="14" gapBefore="0" duration="7">
      <Effects />
      <Transitions />
      <BoundProperties>
        <BoundPropertyFloatSet Name="diffuseColor">
          <BoundPropertyFloatElement Value="0" />
          <BoundPropertyFloatElement Value="0" />
          <BoundPropertyFloatElement Value="0" />
        </BoundPropertyFloatSet>
        <BoundPropertyFloat Name="transparency" Value="0" />
      </BoundProperties>
    </TitleClip>
    <TitleClip extentID="15" gapBefore="24.70015948803831" duration="7">
      <Effects>
        <TextEffect effectTemplateID="TextEffectTemplate" TextScriptId="0">
          <BoundProperties>
            <BoundPropertyBool Name="automatic" Value="false" />
            <BoundPropertyFloatSet Name="color">
              <BoundPropertyFloatElement Value="1" />
              <BoundPropertyFloatElement Value="1" />
              <BoundPropertyFloatElement Value="1" />
            </BoundPropertyFloatSet>
            <BoundPropertyStringSet Name="family">
              <BoundPropertyStringElement Value="Segoe UI" />
            </BoundPropertyStringSet>
            <BoundPropertyBool Name="horizontal" Value="true" />
            <BoundPropertyStringSet Name="justify">
              <BoundPropertyStringElement Value="MIDDLE" />
            </BoundPropertyStringSet>
            <BoundPropertyFloatSet Name="length">
              <BoundPropertyFloatElement Value="4.0999999046325684" />
              <BoundPropertyFloatElement Value="5.1999998092651367" />
            </BoundPropertyFloatSet>
            <BoundPropertyFloat Name="maxExtent" Value="5" />
            <BoundPropertyFloatSet Name="position">
              <BoundPropertyFloatElement Value="0.046579360961914063" />
              <BoundPropertyFloatElement Value="2.1395349502563477" />
              <BoundPropertyFloatElement Value="0.02500000037252903" />
            </BoundPropertyFloatSet>
            <BoundPropertyFloat Name="size" Value="0.5" />
            <BoundPropertyStringSet Name="string">
              <BoundPropertyStringElement Value="Step 3. Discrete droplets are created by " />
              <BoundPropertyStringElement Value="alternatively pumping the gradient plug and " />
              <BoundPropertyStringElement Value="FC3283 oil into a microfluidic T junction. " />
              <BoundPropertyStringElement Value="Concentration in each droplet is different as a " />
              <BoundPropertyStringElement Value="result of previous convection-diffusion " />
              <BoundPropertyStringElement Value="process.  " />
            </BoundPropertyStringSet>
            <BoundPropertyString Name="style" Value="Plain" />
            <BoundPropertyFloat Name="transparency" Value="0" />
          </BoundProperties>
        </TextEffect>
      </Effects>
      <Transitions />
      <BoundProperties>
        <BoundPropertyFloatSet Name="diffuseColor">
          <BoundPropertyFloatElement Value="0.75" />
          <BoundPropertyFloatElement Value="1" />
          <BoundPropertyFloatElement Value="0" />
        </BoundPropertyFloatSet>
        <BoundPropertyFloat Name="transparency" Value="1" />
      </BoundProperties>
    </TitleClip>
    <ExtentSelector extentID="1" gapBefore="0" primaryTrack="true">
      <Effects />
      <Transitions />
      <BoundProperties />
      <ExtentRefs>
        <ExtentRef id="8" />
        <ExtentRef id="5" />
        <ExtentRef id="10" />
        <ExtentRef id="6" />
        <ExtentRef id="12" />
        <ExtentRef id="17" />
        <ExtentRef id="14" />
        <ExtentRef id="19" />
        <ExtentRef id="22" />
        <ExtentRef id="24" />
        <ExtentRef id="26" />
        <ExtentRef id="28" />
      </ExtentRefs>
    </ExtentSelector>
    <ExtentSelector extentID="2" gapBefore="0" primaryTrack="false">
      <Effects />
      <Transitions />
      <BoundProperties />
      <ExtentRefs />
    </ExtentSelector>
    <ExtentSelector extentID="3" gapBefore="0" primaryTrack="false">
      <Effects />
      <Transitions />
      <BoundProperties />
      <ExtentRefs />
    </ExtentSelector>
    <ExtentSelector extentID="4" gapBefore="0" primaryTrack="false">
      <Effects />
      <Transitions />
      <BoundProperties />
      <ExtentRefs>
        <ExtentRef id="9" />
        <ExtentRef id="11" />
        <ExtentRef id="13" />
        <ExtentRef id="15" />
        <ExtentRef id="23" />
        <ExtentRef id="27" />
      </ExtentRefs>
    </ExtentSelector>
  </Extents>
  <BoundPlaceholders>
    <BoundPlaceholder placeholderID="SingleExtentView" extentID="0" />
    <BoundPlaceholder placeholderID="Main" extentID="1" />
    <BoundPlaceholder placeholderID="SoundTrack" extentID="2" />
    <BoundPlaceholder placeholderID="Text" extentID="4" />
    <BoundPlaceholder placeholderID="Narration" extentID="3" />
  </BoundPlaceholders>
  <BoundProperties>
    <BoundPropertyFloatSet Name="AspectRatio">
      <BoundPropertyFloatElement Value="1.7777776718139648" />
    </BoundPropertyFloatSet>
    <BoundPropertyFloat Name="SoundTrackMix" Value="0" />
  </BoundProperties>
  <ThemeOperationLog themeID="0">
    <MonolithicThemeOperations />
  </ThemeOperationLog>
</Project>
